# Supplementary material for: Oculodentodigital Dysplasia: A Case Report and Major Review of the Eye and Ocular Adnexa Features of 295 Reported Cases
Source: Case Rep Ophthalmol Med. 2020 Apr 4;2020:6535974. doi: 10.1155/2020/6535974 (PMC7165356; doi:10.1155/2020/6535974)
Supplement: Supplementary Materials — Supplementary Material 1: all GJA1 mutations with associated eye and ocular adnexa features. This dataset groups patients with ODDD by GJA1 mutation and reports the associated eye and ocular adnexa features. [file 6535974.f1.xlsx]

## Sheet: Sheet1
Sources	Multiple Mutations?	GJA1 Mutation				Individuals with a Molecular Confirmed GJA1 Pathogenic Variant					Untested Individuals with both ODDD Phenotype and Known Relative with Molecular Confirmation					Total Individuals with the ODDD Phenotype					Structural Ocular Features										Ocular Disorders			Structural Adnexal Featues			Additional Findings
		Nucleotide	Protein	Unspecified	Protein Domain (obtained from UniProt - P17302)	Male		Female		Total	Male		Female		Total	Male		Female		Total	Orbit	Lens	Cornea	Retina/Fundus	Optic Disc	Uvea	Pupil	Vitreous	Sclera	Anterior Chamber	Refractive Errors	Eye Movement Disorders	Additional Eye Disorders	Eyelid	Eyebrow/Eyelash	Lacrimal	ERG	Neurological
Cavusoglu et al., 2019	No	c.168_169insT	p.Q57SfsTer6		E-1	1	1	0	0	1	0	-	0	-	0	1	1	0	0	1	microphthalmia (1)	cataract (1)												short palpebral fissures (1)
Aminabadi et al., 2010 & Aminabadi et al., 2009	No			Missense mutation exon 2 (unspecified)	N/A	1	1	0	0	1	2	0.666667	1	0.333333	3	3	0.75	1	0.25	4	microphthalmia (1)	cataract (1)	microcornea (1)			uveitis (1)							glaucoma (1)	epicanthus (1), telecanthus (1), short palpebral fissures (1), ptosis (1)
Dwarakanathan et al., 2015, Furuta et al., 2012	No	c.75G>T	p.W25C		TM-1	1	0.5	1	0.5	2	0	-	0	-	0	1	0.5	1	0.5	2	microphthalmia (2), hypertelorism (1)		microcornea (1)								hyperopia (1)	strabismus (2)	glaucoma (1)	epicanthus (1), ptosis (1)	madarosis (1), flared eyebrows (1) [1 medially flared]
Quick & Dobersen et al., 2014, National Center for Biotechnology Information, 2020	Yes	c.605G>A	p.R202H		E-2	1	1	0	0	1	0	-	0	-	0	1	1	0	0	1	microphthalmia (1)
		c.717G>A	p.R239R		C-terminus
Paznekas et al., 2009, Paznekas et al., 2003	No	c.605G>A	p.R202H		E-2	1	0.125	7	0.875	8	4	0.444444	5	0.555556	9	5	0.294118	12	0.705882	17	microphthalmia (1)		microcornea (2)
Jamsheer et al., 2010	Yes	c.301C>T	p.R101X		C-1	1	1	0	0	1	0	-	0	-	0	1	1	0	0	1	microphthalmia (1), hypertelorism (1)	cataract (1)	microcornea (1)								myopia (1)			epicanthus (1)
		c.6delT	p.G2fsX7		N-terminus
Jamsheer et al., 2010	No	c.301C>T	p.R101X		C-1	0	0	1	1	1	0	-	0	-	0	0	0	1	1	1	microphthalmia (1)
Paznekas et al., 2009, Joss et al., 2008 & Richardson et al., 2006	No	c.97C>T	p. R33X		TM-1	0	0	2	1	2	0	-	0	-	0	0	0	2	1	2	microphthalmia (2)	cataract (1)	microcornea (2)				persistent pupillary membrane (1)
Paznekas et al., 2009, Richardson et al., 2004, Paznekas et al., 2003 & Gladwin et al., 1997*unknown which individuals tested	No	c.93T>C	p.I31M		TM-1	0	-	0	-	0	4	0.5	4	0.5	8	4	0.5	4	0.5	8			microcornea (8)											short palpebral fissures (8)
Wang et al., 2019	No	c.91A>T	p.I311P		C-terminus	1	1	0	0	1	0	-	0	-	0	1	1	0	0	1			microcornea (1), corneal opacity (1)	retinal dysplasia (1)		chorioid thinning (1)							glaucoma (1)				loss of flash ERG (1)
Paznekas et al., 2009 & van Steensel et al., 2005	No	c.780_781delTG	p.C260fsX306		C-terminus	1	0.333333	2	0.666667	3	0	-	0	-	0	1	0.333333	2	0.666667	3	hypotelorism (2)		microcornea (1)			pale irides (2)					myopia (2), hyperopia (1) [1 anisometropic)			epicanthus (2), short palpebral fissures (3)	madarosis (1)
Paznekas et al., 2009, Paznekas et al., 2003, & Gorlin et al., 1963	No	c.68A>C	p.K23T		TM-1	1	1	0	0	1	0	-	0	-	0	1	1	0	0	1	microphthalmia (1), hypotelorism (1)		microcornea (1)				persistent pupillary membrane (1)							epicanthus (1)
Dwarakanathan et al., 2015, Paznekas et al., 2009 & Vreeburg et al., 2007	No	c.689_690delAT	p.Y230fsX236		TM-4 & C-terminus	0	0	3	1	3	1	1	0	0	1	1	0.25	3	0.75	4	hypertelorism (2), hypotelorism (1)														flared eyebrows (2) [1 medially flared]
This study, Gumus, 2018, Paznekas et al., 2009, Paznekas et al., 2003, & Traboulsi and Parks, 1990	No	c.65G>A	p.G22E		TM-1	0	0	3	1	3	0	-	0	-	0	0	0	3	1	3	microphthalmia (3)	cataract (1)	microcornea (2)	blonde fundus (1)			persistent pupillary membrane (1)			deep anterior chamber (1)	hyperopia (1)	strabismus (2) [1 esotropic], amblyopia (1)	glaucoma (1)	short palpebral fissures (1), epicanthus (1)		nasolacrimal duct obstruction (1)
Wiest et al., 2006	No	c.659C>A	p.S220Y		TM-4	0	0	1	1	1	0	-	0	-	0	0	0	1	1	1	microphthalmia (1)												glaucoma (1)
Paznekas et al., 2009, Paznekas et al., 2003, & Norton et al, 1995	No	c.646G>T	p.V216L		TM-4	1	1	0	0	1	4	0.8	1	0.2	5	5	0.833333	1	0.166667	6			microcornea (1)				persistent pupillary membrane (1)
Park et al., 2017, Paznekas et al., 2009, Paznekas et al., 2003	No	c.61G>A	p.G21R		TM-1	0	0	2	1	2	0	-	0	-	0	0	0	2	1	2	microphthalmia (2)		microcornea (1)									strabismus (1)		epicanthus (1)
Brice et al., 2013	No	c.617A>G	p.K206R		E-2	1	0.333333	2	0.666667	3	1	0.5	1	0.5	2	2	0.4	3	0.6	5	microphthalmia (1)													ptosis (1)
Paznekas et al., 2009	No	c.602C>T	p.S201F		E-2	0	0	1	1	1	0	-	0	-	0	0	0	1	1	1	microphthalmia (1)
Paznekas et al., 2009 & de la Parra et al., 2007	No	c.5G>T	p.G2V		N-terminus	1	1	0	0	1	0	-	0	-	0	1	1	0	0	1			microcornea (1)		optocilliary vein (1)
Vitiello et al., 2005 & Vingolo et al., 1994	No	c.581A>C	p.H194P		E-2	3	0.375	5	0.625	8	3	0.5	3	0.5	6	6	0.428571	8	0.571429	14	microphthalmia (14)	cataract (1)	microcornea (2), opaque cornea (2)			thick choroid (2), uveitis (8)				shallow anterior chamber (1)		nystagmus (2)	glaucoma (8)
Paznekas et al., 2009, Paznekas et al., 2003 & Judisch et al., 1979*unknown which individuals tested	No	c.52T>C	p.S18P		TM-1	0	-	0	-	0	1	0.25	3	0.75	4	1	0.25	3	0.75	4						anterior iris stroma hypoplasia (3), iridoschisis (1)	persistent pupillary membrane (3)					strabismus (1) [1 esotropic)		epicanthus (1), short palpebral fissures (1)	madarosis (4)
Paznekas et al., 2009, Paznekas et al., 2003	No	c.50A>C	p.Y17S		TM-1	3	0.428571	4	0.571429	7	0	-	0	-	0	3	0.428571	4	0.571429	7	microphthalmia (3)		microcornea (6)			iris abnormalities (2)							glaucoma (3)
Paznekas et al., 2009 & Debeer et al., 2005	No	c.504_506delCTT	p.F169del		TM-3	0	0	1	1	1	0	-	0	-	0	0	0	1	1	1														short palpebral fissures (1)
Wiest et al., 2006 & Thomsen et al., 1998	No	c.461C>A	p.T154N		C-1	0	0	2	1	2	0	0	1	1	1	0	0	3	1	3	microphthalmia (2)		microcornea (1)									strabismus (1)	glaucoma (2)
Paznekas et al., 2009, van Es et al., 2007	No	c.460A>G	p.T154A		C-1	0	0	2	1	2	0	-	0	-	0	0	0	2	1	2	microphthalmia (1)		microcornea (2)		optic disc hypervascularity (1)	pale irides (1), iris abnormalities (1)						strabismus (1)	glaucoma (1)	epicanthus (1)
Paznekas et al., 2009, Richardson et al., 2004, Paznekas et al., 2003 Gladwin et al., 1997, Schrander-Stumpel et al., 1993*unknown which individuals tested	No	c.443G>A	p.R148Q		C-1	0	-	0	-	0	2	0.5	2	0.5	4	2	0.5	2	0.5	4														epicanthus (1)
Taşdelen et al., 2018	No	c.442C>T	p.R148Ter		C-1	1	1	0	0	1	0	-	0	-	0	1	1	0	0	1	microphthalmia (1), hypertelorism (1)		microcornea (1)											epicanthus (1)
Paznekas et al., 2009, Debeer et al., 2005, & Spaepen et al., 1991	No	c.440Y>C	p.M147T		C-1	0	0	1	1	1	0	-	0	-	0	0	0	1	1	1	microphthalmia (1)	opaque lens (1)	microcornea (1)									Duane syndrome (1)
Paznekas et al., 2009, Richardson et al., 2004 & Brueton et al. 1990*unknown which individuals tested	No	c.427G>A	p.G143S		C-1	0	-	0	-	0	8	0.888889	1	0.111111	9	8	0.888889	1	0.111111	9	hypotelorism (1)										myopia (1), astigmatism (1)
Orosz et al., 2018	No	c.413G>A	p.G138D		C-1	1	1	0	0	1	0	-	0	-	0	1	1	0	0	1			microcornea (1)							shallow anterior chamber (1)	myopia (1)
Paznekas et al., 2009, Paznekas et al., 2003, & Shapiro et al., 1997	No	c.412G>C	p.G138R		C-1	1	0.333333	2	0.666667	3	2	0.5	2	0.5	4	3	0.428571	4	0.571429	7			microcornea (1)															occipital subcortical white matter changes (1), delayed visual evoked responses (1)
Kogame et al., 2014	No	c.412G>A	p.G138S		C-1	1	1	0	0	1	0	-	0	-	0	1	1	0	0	1												strabismus (1)	glaucoma (1)
Paznekas et al., 2009, Richardson et al., 2004, Paznekas et al., 2003 & Gladwin et al., 1997*unknown which individuals tested	No	c.402G>T	p.K134N		C-1	0	-	0	-	0	0	0	2	1	2	0	0	2	1	2
Paznekas et al., 2009, Paznekas et al., 2003	No	c.400A>G	p.K134E		C-1	0	0	1	1	1	0	-	0	-	0	0	0	1	1	1
Nishat et al., 2012, Paznekas et al., 2009, Paznekas et al., 2003, Amador et al., 2008	No	c.389T>C	p.I130T		C-1	7	0.636364	4	0.363636	11	5	0.833333	1	0.166667	6	12	0.705882	5	0.294118	17	microphthalmia (4), hypotelorism (6)	cataract (1)			pale/atrophic optic disc (1)									short palpebral fissures (4)
Paznekas et al., 2009 & Musa et al., 2008, Wiest et al., 2006 & Loddenkemper et al., 2002	No	c.338T>C	p.L113P		C-1	2	0.5	2	0.5	4	1	1	0	0	1	3	0.6	2	0.4	5	hypotelorism (1)	cataract (1)	microcornea (3)							shallow anterior chamber (2)			glaucoma (3)	epicanthus (1), short palpebral fissures (4), ptosis (1)
Paznekas et al., 2009 & Debeer et al., 2005	No	c.330G>C	p.E110D		C-1	2	0.4	3	0.6	5	1	0.333333	2	0.666667	3	3	0.375	5	0.625	8	hypotelorism (5)													short palpebral fissure (5)
Paznekas et al., 2009 & Kelly et al., 2006	No	c.32T>C	p.L11P		N-terminus	0	0	1	1	1	0	-	0	-	0	0	0	1	1	1	microphthalmia (1)		microcornea (1)										glaucoma (1)
Gabriel et al., 2011, Jamsheer et al., 2009	No	c.31C>T	p.L11F		N-terminus	0	0	2	1	2	0	-	0	-	0	0	0	2	1	2			microcornea (2)	dysplastic fundus (1)	dysplastic optic disc (1), pale/atrophic optic disc (1)						myopia (2), hyperopia (1) [1 anisometropic]	strabismus (2) [1 esotropic], amblyopia (1)		epicanthus (1), short palpebral fissures (1)	madarosis (1)
Porntaveetus et al., 2017	No	c.31C>A	p.L11I		N-terminus	1	1	0	0	1	0	-	0	-	0	1	1	0	0	1	microphthalmia (1)		microcornea (1)									strabismus (1)		epicanthus (1), telecanthus (1), ptosis (1)
Jamsheer et al., 2014	No	c.317T>G	p.L106R		C-1	2	1	0	0	2	0	-	0	-	0	2	1	0	0	2	microphthalmia (1)												glaucoma (1)
Paznekas et al., 2009 & Nivelon-Chevallier et al., 1981	No	c.317T>C	p.L106P		C-1	1	1	0	0	1	0	-	0	-	0	1	1	0	0	1	microphthalmia (1), hypotelorism (1)		microcornea (1)										glaucoma (1)
Paznekas et al., 2009, Paznekas et al., 2003	No	c.306G>C	p.K102N		C-1	1	0.333333	2	0.666667	3	0	-	0	-	0	1	0.333333	2	0.666667	3	microphthalmia (3)		microcornea (2)			iris abnormalities (1)
Paznekas et al., 2009, Paznekas et al., 2003, & Wooldridge et al., 1977	No	c.293A>G	p.Y98C		TM-2	1	0.25	3	0.75	4	1	0.5	1	0.5	2	2	0.333333	4	0.666667	6
Paznekas et al., 2009	No	c.287T>C	p.V96A		TM-2	0	0	1	1	1	0	-	0	-	0	0	0	1	1	1	microphthalmia (1)		microcornea (1)									strabismus (1)
Wiest et al., 2006	No	c.287T>A	p.V96E		TM-2	0	0	1	1	1	0	-	0	-	0	0	0	1	1	1	microphthalmia (1)										hyperopia (1)		glaucoma (1)
Paznekas et al., 2009 & Kjaer et al., 2004	No	c.286G>A	p.V96M		TM-2	2	0.5	2	0.5	4	0	-	0	-	0	2	0.5	2	0.5	4	hypertelorism (4)
Paznekas et al., 2009 & Honkaniemi et al., 2005	No	c.284A>G	p.H95R		TM-2	0	0	1	1	1	0	0	1	1	1	0	0	2	1	2					optic disc atrophy (1)						myopia (1)		paracentral scotoma (1)					delayed visual evoked potentials (1)
Paznekas et al., 2009, Paznekas et al., 2003, & Opjordsmoen and Nyberg-Hansen, 1980	No	c.268C>G	p.L90V		TM-2	4	1	0	0	4	3	0.6	2	0.4	5	7	0.777778	2	0.222222	9			microcornea (1)										glaucoma (1)
Jamsheer et al., 2014	No	c.257C>A	p.S86Y		TM-2	0	0	1	1	1	0	-	0	-	0	0	0	1	1	1	hypertelorism (1)												glaucoma (1)	short palpebral fissures (1)
Pizzuti et al., 2004	No	c.227G>A	p.R76H		E-1	1	1	0	0	1	0	-	0	-	0	1	1	0	0	1														short palpebral fissures (1)	madarosis (1)
Izumi et al., 2013	No	c.226C>T	p.R76C		E-1	1	1	0	0	1	0	-	0	-	0	1	1	0	0	1														short palpebral fissures (1), telecanthus (1)
Paznekas et al., 2009 Paznekas et al., 2003, & Stanislaw et al., 1998	No	c.226C>A	p.R76S		E-1	0	0	2	1	2	0	0	2	1	2	0	0	4	1	4		cataract (1)	microcornea (1)										glaucoma (1)
Choi et al., 2018	No	c.221A>C	p.H74P		E-1	1	1	0	0	1	0	-	0	-	0	1	1	0	0	1														short palpebral fissures (1)
Paznekas et al., 2009, Richardson et al., 2004, Paznekas et al., 2003 & Gladwin et al., 1997*unknown which individuals tested	No	c.206C>A	p.S69Y		E-1	0	-	0	-	0	2	0.285714	5	0.714286	7	2	0.285714	5	0.714286	7	microphthalmia (3)		microcornea (3)										glaucoma (1)
Paznekas et al., 2009 & Vasconcellos et al., 2005	No	c.176C>A	p.P59H		E-1	4	0.5	4	0.5	8	1	1	0	0	1	5	0.555556	4	0.444444	9	microphthalmia (8)		microcornea (8)			iris atrophy (peripullary) (8)				shallow anterior chamber (2)			glaucoma (4) [2 closed-angle, 1 open-angle]
Paznekas et al., 2009	No	c.145_147dupCAG	p.Q49dup		E-1	0	0	1	1	1	0	-	0	-	0	0	0	1	1	1	microphthalmia (1), hypotelorism (1)	cataract (1)	microcornea (1)			iris abnormalities (1)	eccentric pupuls (1)						glaucoma (1)
Pazenkas et al., 2009, Paznekas et al., 2003, Weintraub et al., 1975 & Gellis and Feingold, 1974	No	c.154_156dupTTT	p.F52dup		E-1	1	1	0	0	1	1	0.5	1	0.5	2	2	0.666667	1	0.333333	3	microphthalmia (2)		microcornea (2), corneal farinata (1)			iris abnormalities (1)	persistent pupillary membrane (1)					strabismus (1) [1 esotropic]		epicanthus (2), short palpebral fissures (1)
Hadjichristou et al., 2017, Paznekas et al., 2009	No	c.146A>C	p.Q49P		E-1	1	0.5	1	0.5	2	0	-	0	-	0	1	0.5	1	0.5	2	microphthalmia (1)		microcornea (2)				eccentric pupuls (1)							telecanthus (1), epicanthus (1), short palpebral fissures (1)			low voltage ERG (1)
Izumi et al., 2013	No	c.145C>G	p.Q49E		E-1	0	0	1	1	1	0	-	0	-	0	0	0	1	1	1	hypertelorism (1)										hyperopia (1)
Paznekas et al., 2009, Paznekas et al., 2003	No	c.145C>A	p.Q49K		E-1	3	0.6	2	0.4	5	0	-	0	-	0	3	0.6	2	0.4	5	hypertelorism (3), hypotelorism (1)
Amano et al., 2012, Feller et al., 2008, Paznekas et al., 2009 & Itro et al., 2005	No	c.142G>A	p.E48K		E-1	3	1	0	0	3	0	-	0	-	0	3	1	0	0	3	microphthalmia (2), hypertelorism (2)	cataract (1)	microcornea (1)									strabismus (1)		epicanthus (2), telecanthus (1), ptosis (1), blepharophimosis (1)		nasolacrimal duct abnormalities (1)
Jamsheer et al., 2014	No	c.139G>C	p.D47H		E-1	0	0	3	1	3	0	-	0	-	0	0	0	3	1	3	microphthalmia (3)		microcornea (3)											epicanthus (2), short palpebral fissures (3)
Tumminelli et al., 2016	No	c.125G>C	p.E42Q		E-1	1	1	0	0	1	0	-	0	-	0	1	1	0	0	1	microphthalmia (1)	cataract (1)											glaucoma (1)
Gabriel et al., 2011	No	c.120delGGTTGAGTCAGC	p.V41_A44del		E-1	0	0	1	1	1	1	0.333333	2	0.666667	3	1	0.25	3	0.75	4	microphthalmia (1)		microcornea (1)	dysplastic fundus (1)	dysplastic optic (1)	synechiae (1), ciliary body cysts (1)	persistent pupillary membrane (1)			deep anterior chamber (1)		strabismus (1) [1 esotropic]	glaucoma (1)
Paznekas et al., 2009 & Kellermayer et al., 2005	Yes (Compound heterozygous with GJB2 mutation)	c.121G>C	p.V41L		E-1	0	0	1	1	1	0	-	0	-	0	0	0	1	1	1
			p.R127H (GJB2 mutation)		N/A
Park et al., 2019, Hayashi et al., 2014, Paznekas et al., 2009, Debeer et al., 2005, Paznekas et al., 2003	No	c.119C>T	p.A40V		E-1	6	0.6	4	0.4	10	4	0.571429	3	0.428571	7	10	0.588235	7	0.411765	17	microphthalmia (9), hypertelorism (3), hypotelorism (4), short axial length (4)	cataract (1)	microcornea (8), thick cornea (4)	macular hypoplasia (1)						shallow anterior chamber (4)	myopia (4)	strabismus (6) [1 esotropic]	glaucoma (6)	epicanthus (3)
Wittlieb-Weber et al., 2015	No	c. 175C>T	p.P59S		E-1	1	0.333333	2	0.666667	3	0	-	0	-	0	1	0.333333	2	0.666667	3	hypertelorism (1)
Attig et al., 2016	No	c.396_398delAAA	p.I132_K133delinsM		C-1	3	0.6	2	0.4	5	0	-	0	-	0	3	0.6	2	0.4	5	microphthalmia (4)		microcornea (4)								myopia (4)			short palpebral fissures (1)
Paznekas et al., 2009	No	c.19T>G	p.L7V		N-terminus	1	1	0	0	1	0	-	0	-	0	1	1	0	0	1	microphthalmia (1)
Pace et al., 2019	No	c.287T>G	p.V96G		TM-2	0	0	1	1	1	0	-	0	-	0	0	0	1	1	1	microphthalmia (1)											Strabismus (esotropic) (1)		short palpebral fissures (1), eyelid mucosal hypertrophy (1), telecanthus (1), epicanthus (1)	madarosis (1)
	No	c.77T>C	p.L26P		TM-1	0	0	1	1	1	0	-	0	-	0	0	0	1	1	1	microphthalmia (1)											Strabismus (esotropic) (1), nystagmus (1)		short palpebral fissures (1), epiblepharon (1), epicanthus (1)	madarosis (1)
Himi et al., 2009	No	c.13A>T	p.S5C		N-terminus	0	0	1	1	1	0	-	0	-	0	0	0	1	1	1	microphthalmia (1)		microcornea (1)				persistent pupillary membrane (1)							epicanthus (1), short palpebral fissures (1), telecanthus (1), entropion (1)
Totals						72	0.436364	93	0.563636	165	52	0.530612	46	0.469388	98	124	0.471483	139	0.528517	263
